# Supplementary material for: Uncommon presentation of a rare tumour - incidental finding in an asymptomatic patient: case report and comprehensive review of the literature on intrapericardial solitary fibrous tumours
Source: BMC Cancer. 2017 Sep 2;17:612. doi: 10.1186/s12885-017-3574-0 (PMC5581469; doi:10.1186/s12885-017-3574-0)

asymptomatic  
patient

Regular screening  
chest X-rays  
reported as normal

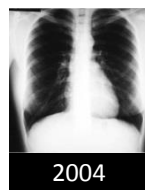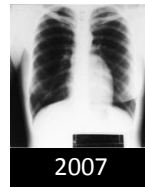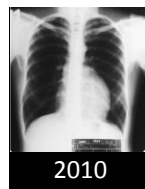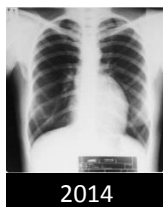

Screening chest X-ray  
Enlarged cardiac  
silhouette

2013

2014

Surgery,  
diagnosis  
of SFT

Echocardiography,  
MRI, coronary CTA

MRI

MRI

2015

MRI

2016

MRI

2017

MRI

Regular MRI  
follow-up:  
no recurrence

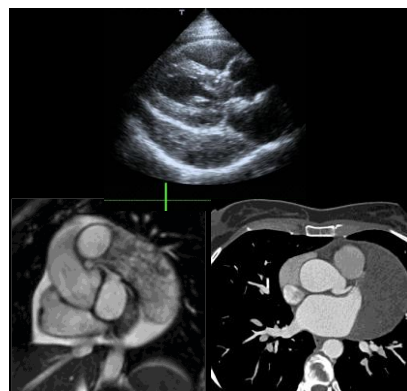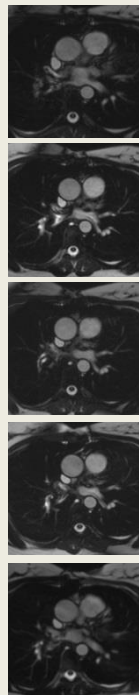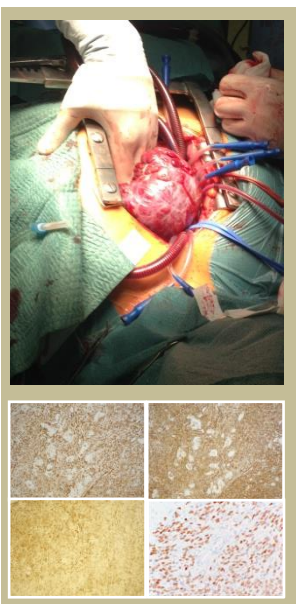

Supplement: Supplementary file 3 — The patient’s clinical history organized as a timeline. (PDF 287 kb) [file 12885_2017_3574_MOESM3_ESM.pdf]
